# Supplementary material for: Unveiling microbiome profiles in human inner body fluids and tumor tissues with pancreatic or biliary tract cancer
Source: PubMed Central journal article supplement (PMC9130259; doi:10.1038/s41598-022-12658-8), 2022-05-24

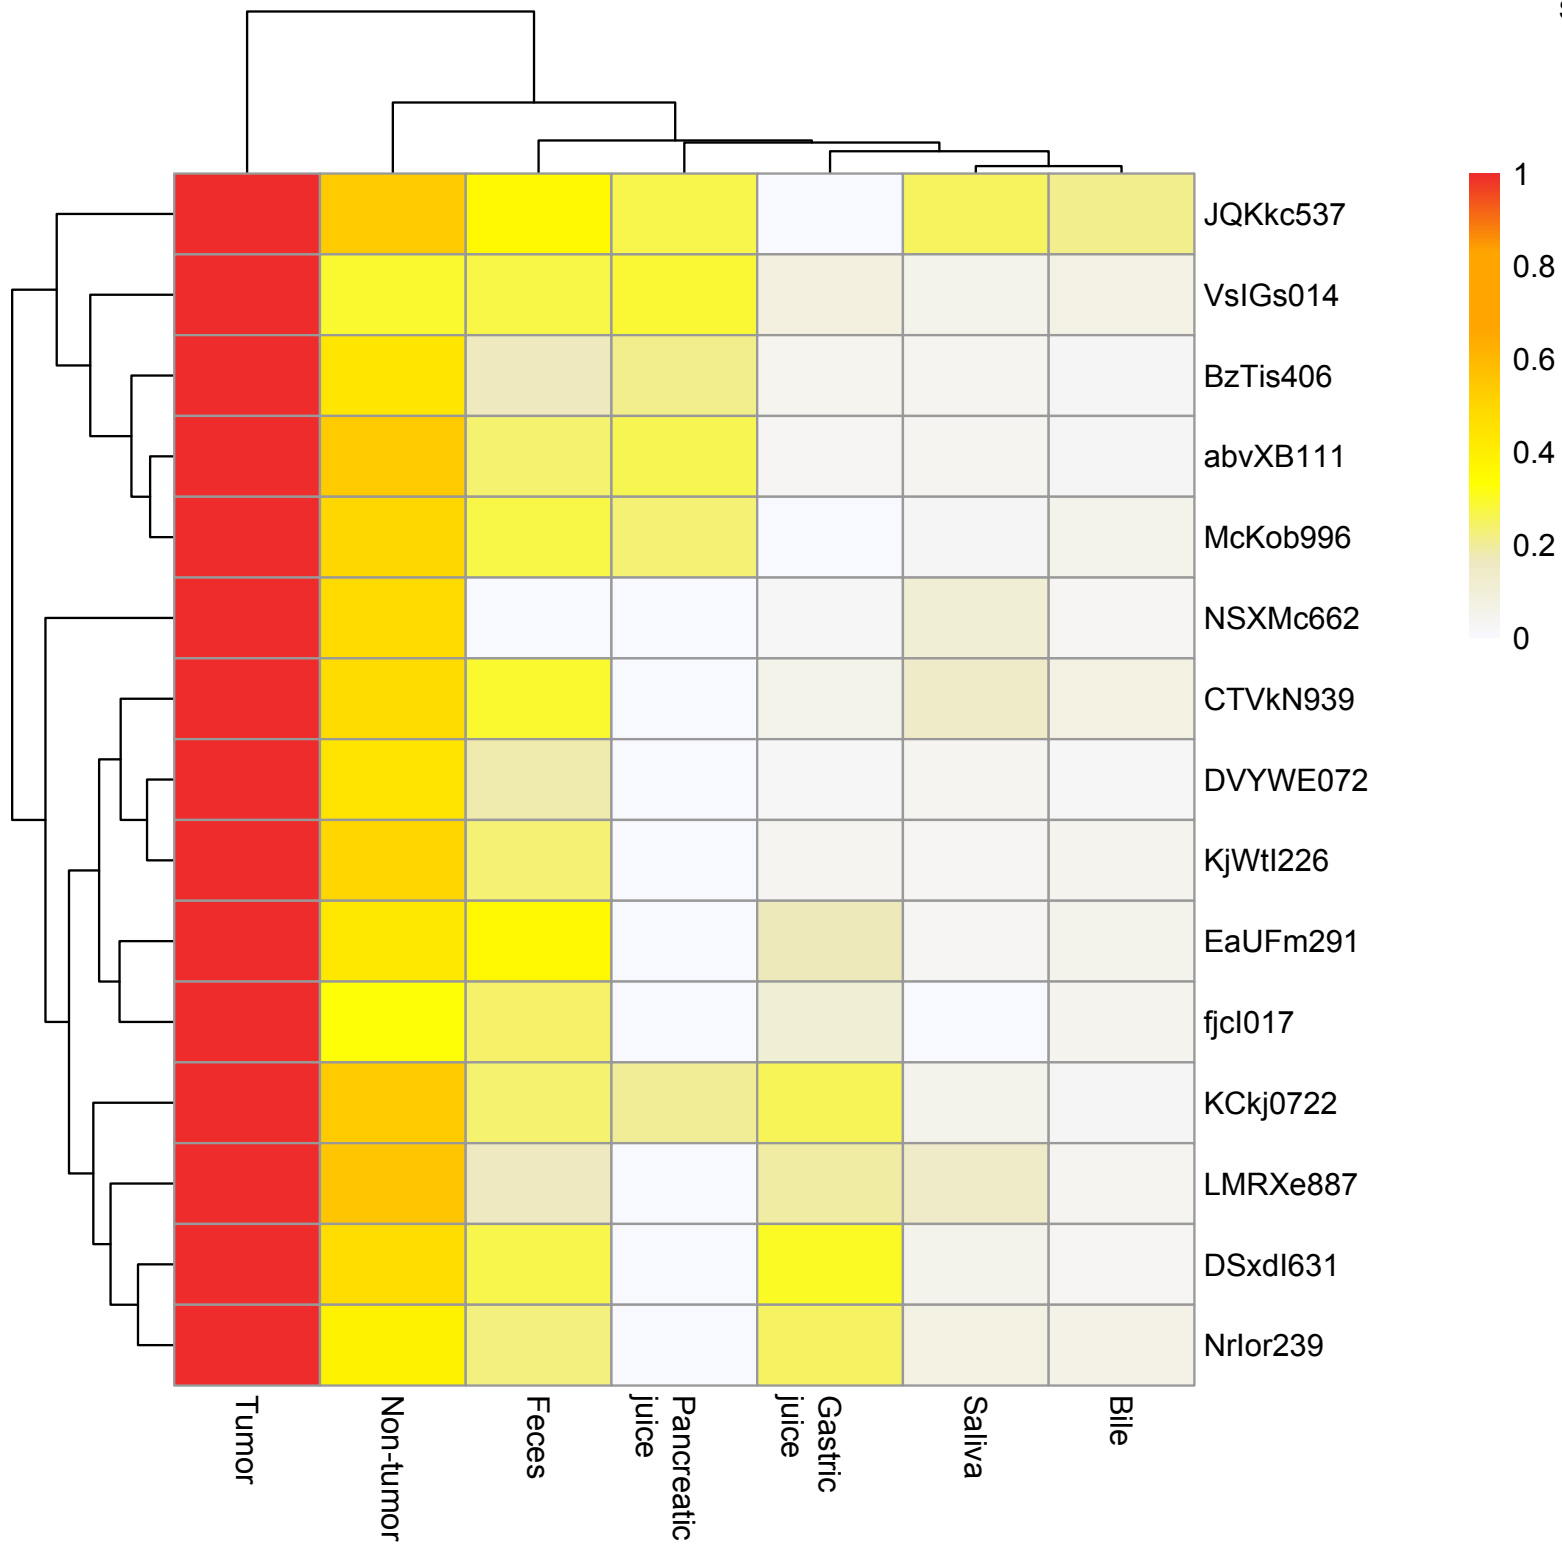

Supplement: 41598_2022_12658_MOESM3_ESM.pdf [file 41598_2022_12658_MOESM3_ESM.pdf]
